# Supplementary material for: Human heterochromatin proteins form large domains containing KRAB-ZNF genes
Source: HighWire-hosted journal article supplement (doi:10.1101/gr.5391806), 2006-10-12
Supplement: LentiProduction_060725.pdf [file LentiProduction_060725.pdf]

# Production of lentiviruses

Version LG-23/08/2005

Adapted protocol from Dirac and Bernards (2003) J Biol Chem 278:11731-11734

Please check <http://www.nki.nl/nkidep/vansteensel> for updated versions of this protocol.

## Cell culture

- Grow 293T cells in 10 cm tissue culture dishes
  - 293T cells are cultured in DMEM + 10% FCS + P/S
- Transfect cells at 80-90% confluency

## Transfection (per 10 cm tissue culture dish)

- Cells are transfected by calcium-phosphate co-precipitation
- Prepare the DNA/CaCl<sub>2</sub>/dH<sub>2</sub>O mix:

|                            |            |                  |
|----------------------------|------------|------------------|
| ◦ Envelope plasmid:        | pMD-G      | 3.5 µg           |
| ◦ Packaging construct:     | pCMV-ΔR8.2 | 6.5 µg           |
| ◦ Rev-encoding plasmid:    | pRSV-Rev   | 2.5 µg           |
| ◦ pL-transfer construct:   |            | 10.0 µg          |
| ◦ 2.5M CaCl <sub>2</sub> : |            | 50.0 µl          |
| ◦ dH <sub>2</sub> O:       |            | Adjust to 500 µl |
- Add 500 µl 2×HBS (pH 7.00), dropwise, while vortexing
- Incubate the precipitate 5 min. at RT
- Add 1 ml precipitate to the tissue culture dish, dropwise
- Gently shake the plate to mix the precipitate with the medium
- Transfer the transfected 293T cells to the lentivirus lab
- Incubate the cells o/n, 37°C, 5% CO<sub>2</sub>
- Replace medium with 6ml fresh medium
- Incubate the cells o/n, 37°C, 5% CO<sub>2</sub>

## Harvest virus

- Harvest virus on 3 consecutive days:
  - Take off medium
  - Add 6 ml fresh medium to the dish
  - Filter through 0.45  $\mu\text{m}$  filter
  - Store filtered medium at 4°C
- After the final harvest:
  - Combine filtered media
  - Aliquot in 1 ml fractions
  - Store at -70°C

## Notes

- All plasmids are ampicillin-resistant
- 2×HBS (pH 7.00):
  - 140 mM NaCl (MW = 58.44)
  - 1.5 mM  $\text{Na}_2\text{HPO}_4 \cdot \text{H}_2\text{O}$  (MW = 177.99)
  - 50 mM HEPES (MW = 238.3)
  - Dissolve in  $\text{dH}_2\text{O}$
  - Set pH with 0.5 M NaOH
  - Filter-sterilise (0.22  $\mu\text{m}$  filter)
  - Aliquot (5 ml fractions)
- Transfection by calcium-phosphate co-precipitation is very pH-sensitive. Make various batches of 2×HBS with different pHs, ranging from 6.80 to 7.20. Do a test-transfection with these 2×HBS batches with a GFP-expressing plasmid.
- 293T cells easily detach from the culture dish. Be very careful with pipetting medium etc.!
