# Supplementary material for: Human heterochromatin proteins form large domains containing KRAB-ZNF genes
Source: HighWire-hosted journal article supplement (doi:10.1101/gr.5391806), 2006-10-12
Supplement: LipofectTransfect_gDNAisol_MCF7_060725.pdf [file LipofectTransfect_gDNAisol_MCF7_060725.pdf]

## **Transfection of MCF-7 with Lipofectamine 2000**

(Maartje Vogel version 120903)

Please check <http://www.nki.nl/nkidep/vansteensel> for updated versions of this protocol.

### ***One day before transfection***

- Harvest cells from exponential phase.
- Seed  $4 \times 10^5$  cells per well (of a 6-well plate) in 2 ml DMEM complete medium (10% FCS + antibiotics (e.g pen/strep)).
- Rock the plate after seeding.

Cells should be ~90% confluent at the time of transfection.

### ***Day of transfection***

Consider the following (control) transfections:

... x Plasmid(s) encoding the Dam protein  
... x Plasmid(s) encoding the Dam-fusion protein (your protein of interest fused to Dam).

Controls:

1 x pH2B-GFP (to determine the transfection efficiency by FACS).  
2 x no plasmid (control in methylation PCR and neg. control for FACS).

1 x pIND-(V5)-EcoDam and  
1 x pIND-Cbx1-V5-EcoDam (serve as a positive control in the methyl-PCR and hybridizations).

1-2 x pIND (empty vector, serves as a control in the methyl PCR).

- For each transfection sample, prepare in separate 1.5 ml tubes:
  - 1) 2  $\mu$ g DNA in 100  $\mu$ l Opti-MEM-1 (RT).
  - 2) 6  $\mu$ l Lipofectamine 2000 in 100  $\mu$ l Opti-MEM-1 (RT). Mix the Lipofectamine gently before use.
- Incubate 5 min. at RT (proceed to next step within 30 min. after diluting the lipofectamine)
- Combine the two solutions, mix gently and incubate for 20 min. at RT (The mixture may appear cloudy).
- In the mean time: wash the cells with DMEM (w/o serum and antibiotics).
- After the 20 min. incubation: add 800  $\mu$ l DMEM (w/o serum and antibiotics) to the DNA-Lipofectamine mixture, mix gently and add this to the cells.
- Incubate for 5 hours in a 37°C incubator.
- Carefully add 1 ml of DMEM (with **20%** FCS, w/o antibiotics) to the cells (don't remove the transfection mixture).
- Incubate o/n in a 37°C incubator.

### ***First day after transfection***

- The next morning: replace transfection mixture with DMEM complete medium.

***Second Day after transfection***

- 48 hours after start of transfection harvest the cells by trypsinization.
- Add ~1.7 ml DMEM complete and transfer cells to a 2 ml tube and spin 5 min. at 300×g.

For FACS samples:

- Remove supernatant, resuspend cells in PBS.
- Transfer the cells to a FACS tube and spin 5 min. at 300×g.
- Remove supernatant and resuspend cells in ~0.5 -1ml PBS.
- Keep cells on ice.
- Perform FACS assay.

For the other samples:

- Remove supernatant as much as possible.
- Continue with the gDNA isolation or store the cell-pellet at -80°C.

**Genomic DNA isolation**

Isolate the gDNA with the DNeasy Tissue kit. Follow the 'DNeasy Protocol for Cultured Animal Cells'.

- Include RNase A in step 1.
- Elute gDNA in 1×200 µl + 1×100 µl buffer AE in a 2 ml tube.
- Measure concentration of gDNA.

***Ordering information***

|                            |            |                     |
|----------------------------|------------|---------------------|
| Lipofectamine 2000         | Invitrogen | Cat. No.: 11668-027 |
| Opti-MEM I                 | Invitrogen | Cat. No.: 31985-047 |
| DNeasy Tissue Kit (50)     | Qiagen     | Cat. No.: 69504     |
| RNase A solution 100 mg/ml | Qiagen     | Mat. No.: 19101     |
