# Supplementary material for: Human heterochromatin proteins form large domains containing KRAB-ZNF genes
Source: HighWire-hosted journal article supplement (doi:10.1101/gr.5391806), 2006-10-12
Supplement: Vogel_FigS1_060721.pdf [file Vogel_FigS1_060721.pdf]

# DamID flowchart

## Transfect / Infect cells<sup>1</sup> with Dam-fusion protein vectors<sup>2</sup>

- Transfections: Use Dam and Dam-fusion protein vectors, include controls (use vector without Dam, take along untransfected cells). Transfect cells with vectors and select for stable integration.
- Lentiviral infections: Use virus to integrate Dam-fusion expression cassettes.
- ▶ *Important:* For DamID Dam-fusion proteins should be expressed at very low levels.

## Isolate genomic DNA

## Amplify methylated gDNA by methylation specific PCR

- Isolate methylated fragment by digestion with DpnI restriction enzyme.
- Ligate adaptors to methylated fragments.
- Amplify methylated fragments by PCR (Visualize PCR product on agarose gel).
- ▶ *Important:* Include negative controls (leave out DpnI and take along unmethylated gDNA), these controls should not give a PCR product.

## Label and hybridize amplified fragments to microarray

- Label amplified DNA fragments.
- Depending on the array type the DNA can be reduced in size by DNase digestion.
- ▶ *Important:* Always cohybridize Dam-fusion against “Dam only” to correct for unspecific Dam binding and local differences in chromatin accessibility.

## Image and Data analysis

- Ratio of the fluorescent signal of Dam-Fusion/Dam denotes the level of binding of the Dam-fusion protein to the probed sequence.

<sup>1</sup> DamID has successfully been used in whole flies, and in fly, human and mouse cell lines, please see [www.nki.nl/nkidep/vansteensel](http://www.nki.nl/nkidep/vansteensel) for detailed protocols.

<sup>2</sup> Please see [www.nki.nl/nkidep/vansteensel](http://www.nki.nl/nkidep/vansteensel) for available vectors.
